# Supplementary material for: Dry-printed electrodes for transcutaneous electrical stimulation of inervated muscles: Towards wearable and closed-loop stimulation
Source: Research Square preprint supplement (doi:10.21203/rs.3.rs-6872550/v1), 2025-06-25
Supplement: Supplementary file 1 [file dbb4ada79a8a71773f3d037c.pdf]

## Supplementary Information

### Dry-printed electrodes for transcutaneous electrical stimulation of innervated muscles: Towards wearable and closed-loop stimulation

Rawan Ibrahim<sup>1,2</sup>, Ieva Vėbraitė<sup>1,2</sup>, Daniele Re<sup>1,2</sup>, Paul F. Funk<sup>3,4</sup>, Gerd Fabian Volk<sup>3,4</sup>, Orlando Guntinas-Lichius<sup>3,4</sup>, and Yael Hanein<sup>1,2,5,6,\*</sup>

<sup>1</sup>School of Electrical and Computer Engineering, Tel Aviv University, Tel Aviv, Israel

<sup>2</sup>Tel Aviv University Center for Nanoscience and Nanotechnology, Tel Aviv, Israel

<sup>3</sup>Facial-Nerve-Center Jena, Jena University Hospital, Jena, Germany

<sup>4</sup>Center for Rare Diseases, Jena University Hospital, Jena, Germany

<sup>5</sup>Sagol School of Neuroscience, Tel Aviv University, Tel Aviv, Israel

<sup>6</sup>X-trodes, Herzlia, Israel

\*yaelha@tauex.tau.ac.il

### Supplementary figures

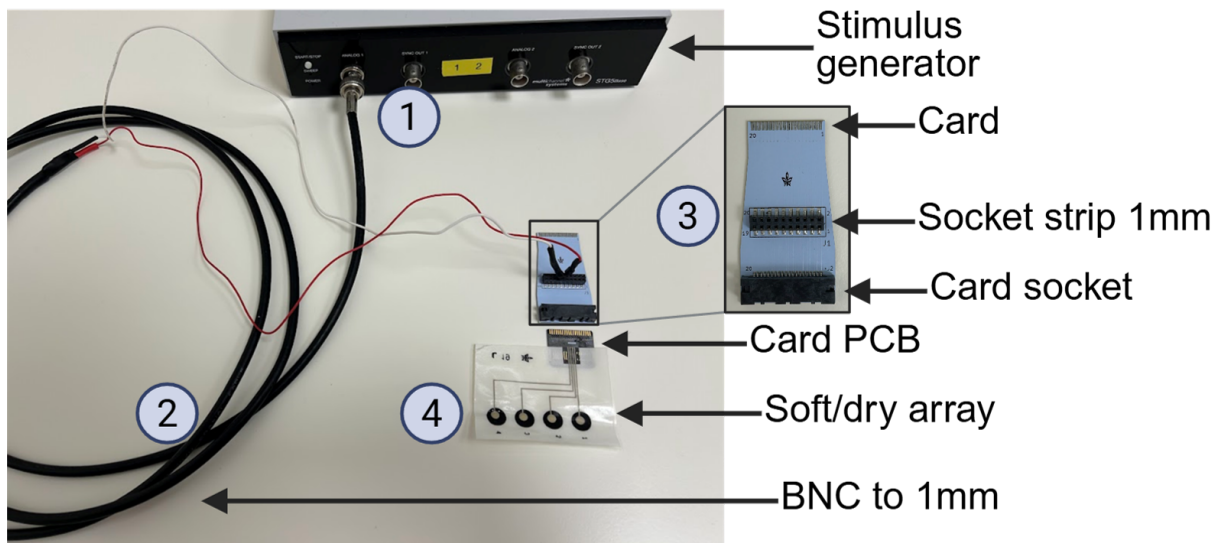

**Figure S1.** Setup for transcutaneous electrical stimulation using dry-printed electrodes. The system includes (1) a stimulus generator (STG5, Multi Channel Systems), (2) BNC-to-1 mm adaptors, (3) a custom PCB connector, and (4) a soft printed electrode array. This configuration ensures stable electrical contact while maintaining flexibility and skin conformity.

### Supplementary Videos

**Video 1:** Demonstration of accessory nerve stimulation using dry and gel electrodes.

**Video 2:** Demonstration of closed-loop facial stimulation.
